# Supplementary material for: Effects of potential shift and efficiency of charge collection on nanotube-based porphyrin-sensitized solar cells with conjugated links of varied length
Source: Royal Society of Chemistry journal article supplement (doi:10.1039/c0cp00458h), 2010-01-01
Supplement: c0cp00458h.pdf [file c0cp00458h.pdf]

## Electronic Supplementary Information (ESI)

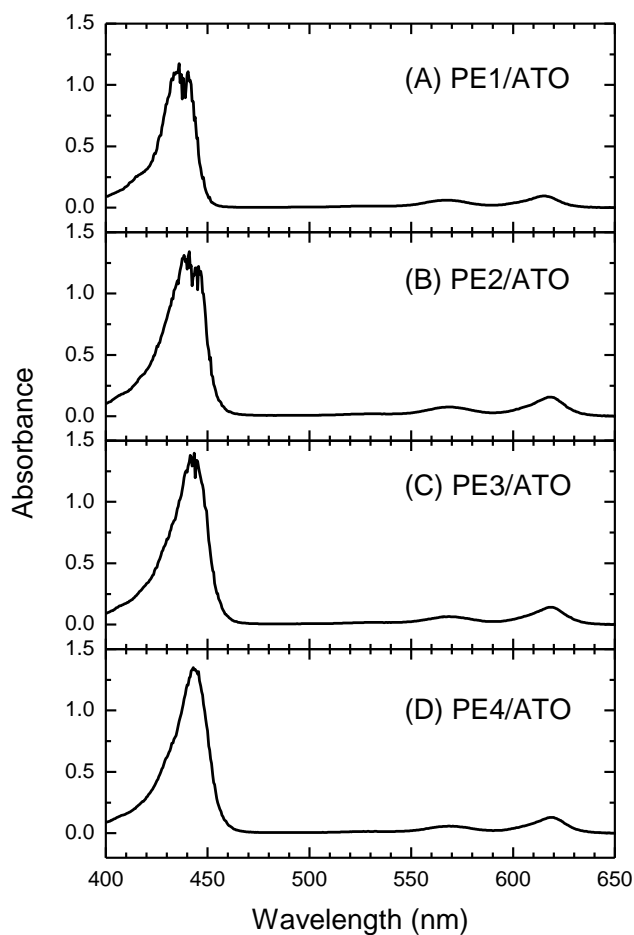

**Figure S1:** Absorption spectra of ATO NT films sensitized with (A) PE1, (B) PE2, (C) PE3 and (D) PE4. These sensitized films were fabricated into NT-DSSC devices for measurements of photovoltaic curves and photocurrent/photovoltage transients. The amounts of dye loading /nmol cm<sup>-2</sup> were determined to be 84, 90, 88 and 86 for PE1-PE4, respectively.

## Transient Photo-current/voltage System

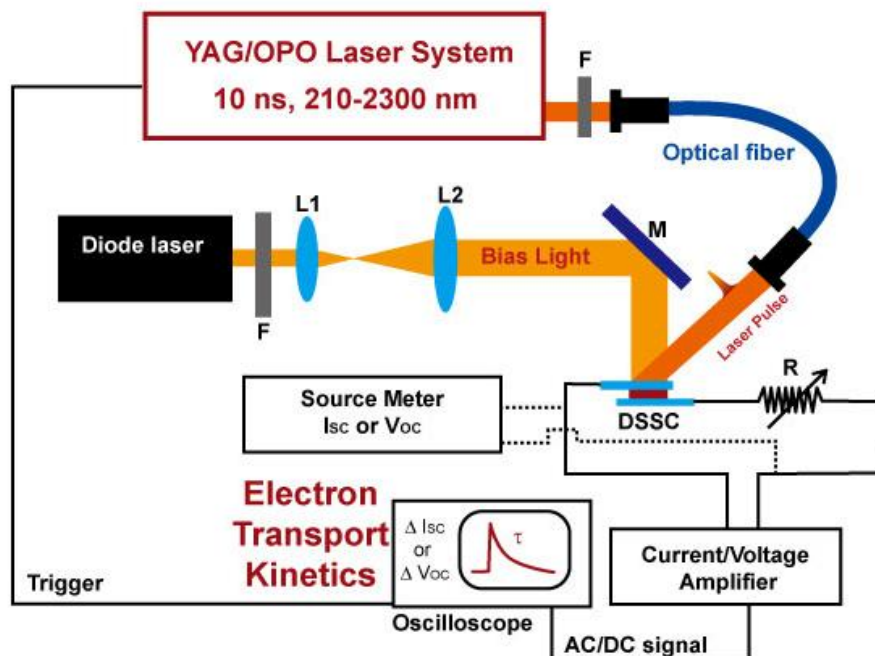

F: ND filter, L: lens, M: mirror, R: tunable resistance, DSSC: dye-sensitized solar cell

**Figure S2:** Experimental setup for measurements of photocurrent and photovoltage decays.

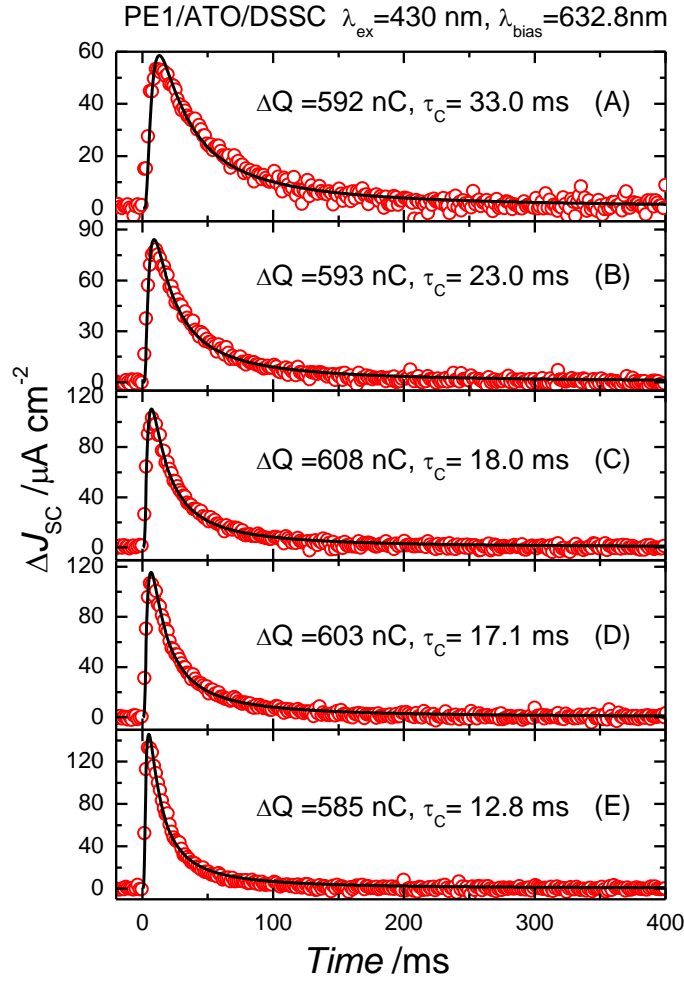

**Figure S3:** Photocurrent transients of PE1/ATO solar cells obtained at a short-circuit condition with pulse excitation at 430 nm under bias illumination at 632.8 nm for photon fluxes  $I_0/10^{15} \text{ cm}^{-2} \text{ s}^{-1} =$  (A) 2.2, (B) 4.7, (C) 6.3, (D) 7.3 and (E) 11. The transient data (circles) were fitted according to a diffusion kinetic model described in the text. Note that the average value of  $\Delta Q$  ( $= 596 \text{ nC}$ ) was used to evaluate chemical capacitance ( $C$ ) via the expression  $C = \Delta Q / \Delta V$ .

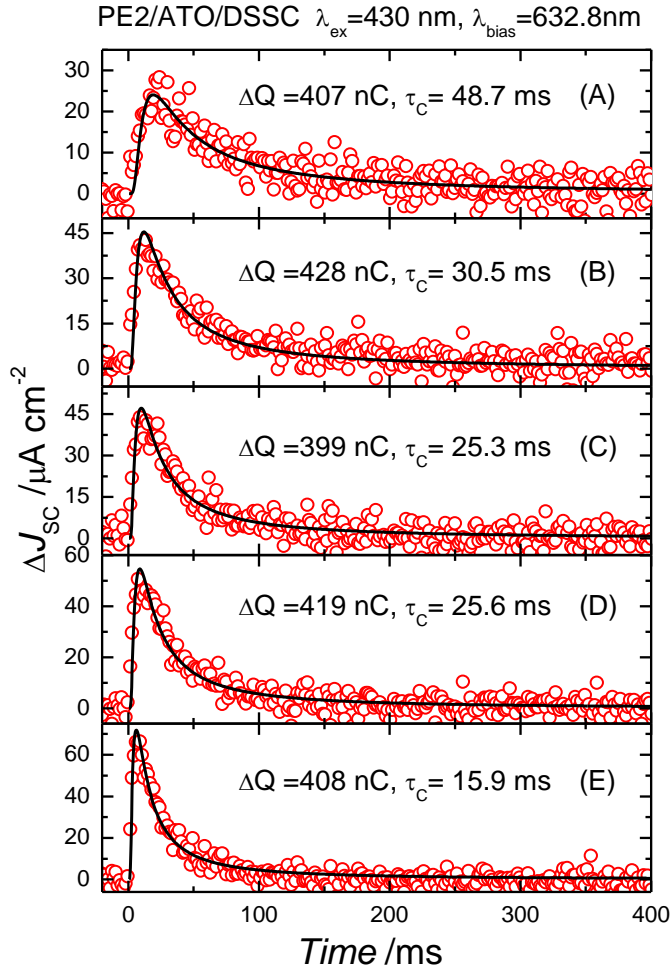

**Figure S4:** Photocurrent transients of PE2/ATO solar cells obtained at a short-circuit condition with pulse excitation at 430 nm under bias illumination at 632.8 nm for photon fluxes  $I_0/10^{15} \text{ cm}^{-2} \text{ s}^{-1} =$  (A) 2.2, (B) 4.7, (C) 6.3, (D) 7.3 and (E) 11. The transient data (circles) were fitted according to a diffusion kinetic model described in the text. The mean value of  $\Delta Q$  ( $= 412 \text{ nC}$ ) was used to evaluate chemical capacitance ( $C$ ) from  $C = \Delta Q / \Delta V$ .

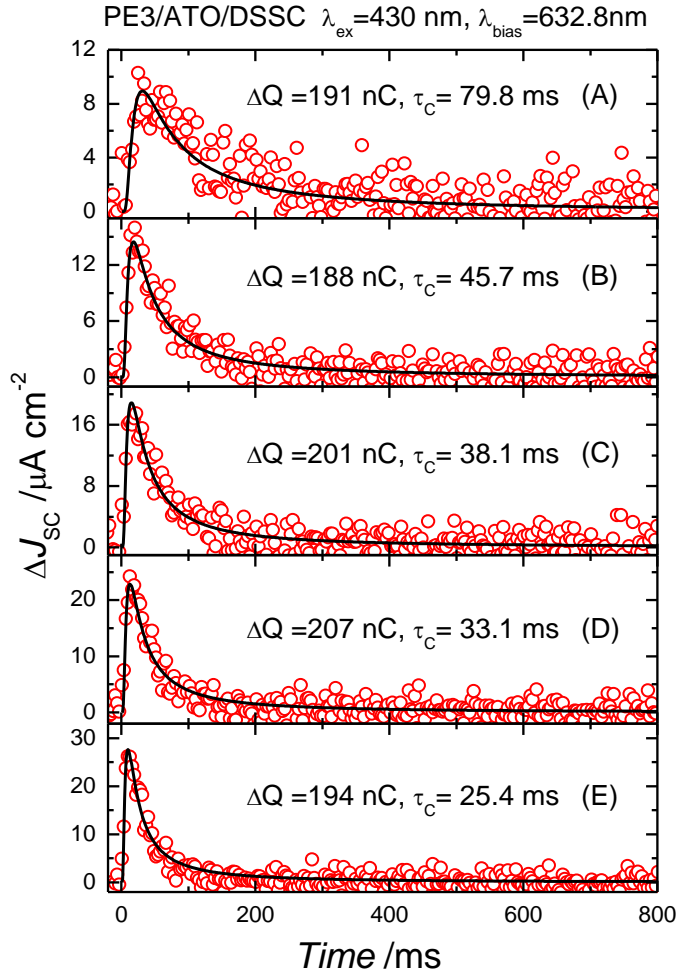

**Figure S5:** Photocurrent transients of PE3/ATO solar cells obtained at a short-circuit condition with pulse excitation at 430 nm under bias illumination at 632.8 nm for photon fluxes  $I_0/10^{15} \text{ cm}^{-2} \text{ s}^{-1} =$  (A) 2.2, (B) 4.7, (C) 6.3, (D) 7.3 and (E) 11. The transient data (circles) were fitted according to a diffusion kinetic model described in the text. The mean value of  $\Delta Q$  ( $= 196 \text{ nC}$ ) was used to evaluate chemical capacitance ( $C$ ) from  $C = \Delta Q / \Delta V$ .

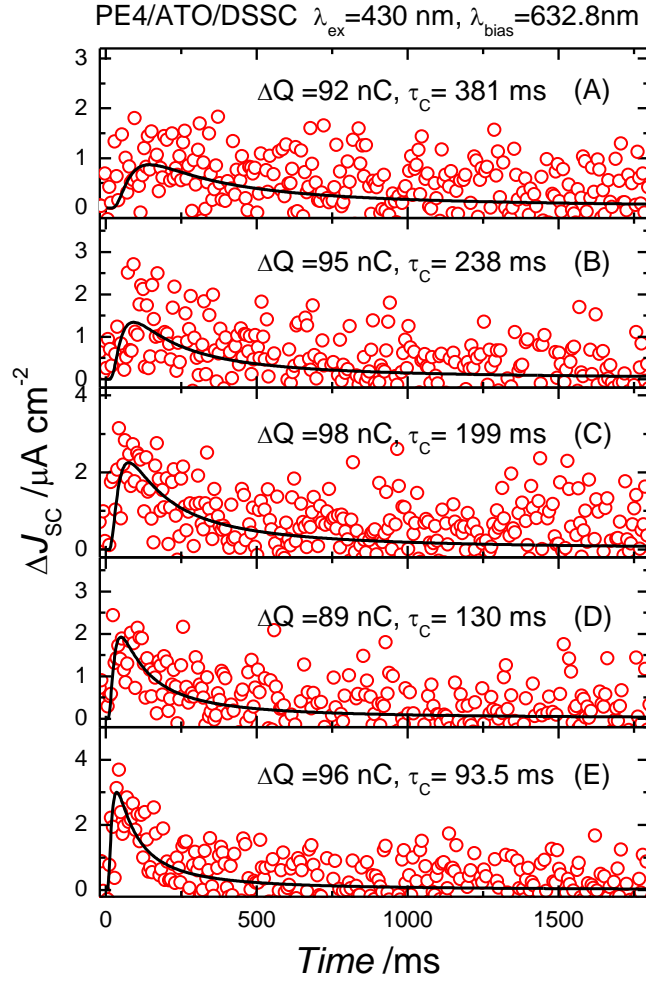

**Figure S6:** Photocurrent transients of PE4/ATO solar cells obtained at a short-circuit condition with pulse excitation at 430 nm under 632.8-nm bias illumination of photon fluxes  $I_0/10^{15} \text{ cm}^{-2} \text{ s}^{-1} =$  (A) 2.2, (B) 4.7, (C) 6.3, (D) 7.3 and (E) 11. The transient data (circles) were fitted according to a diffusion kinetic model described in the text. The mean value of  $\Delta Q$  ( $= 94 \text{ nC}$ ) was used to evaluate chemical capacitance ( $C$ ) from  $C = \Delta Q/\Delta V$ .

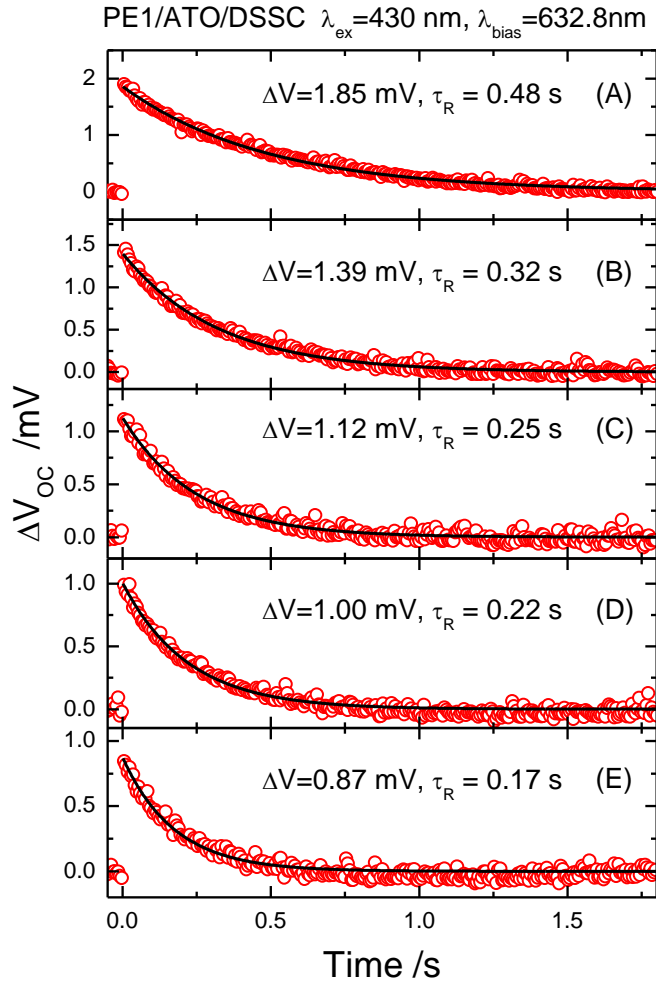

**Figure S7:** Photovoltage transients of PE1/ATO solar cells obtained at an open-circuit condition with pulse excitation at 430 nm under bias illumination at 632.8 nm for photon fluxes  $I_0/10^{15} \text{ cm}^{-2} \text{ s}^{-1} =$  (A) 2.2, (B) 4.7, (C) 6.3, (D) 7.3, and (E) 11. The transient data (circles) were fitted according to a simple kinetic model described in the text.

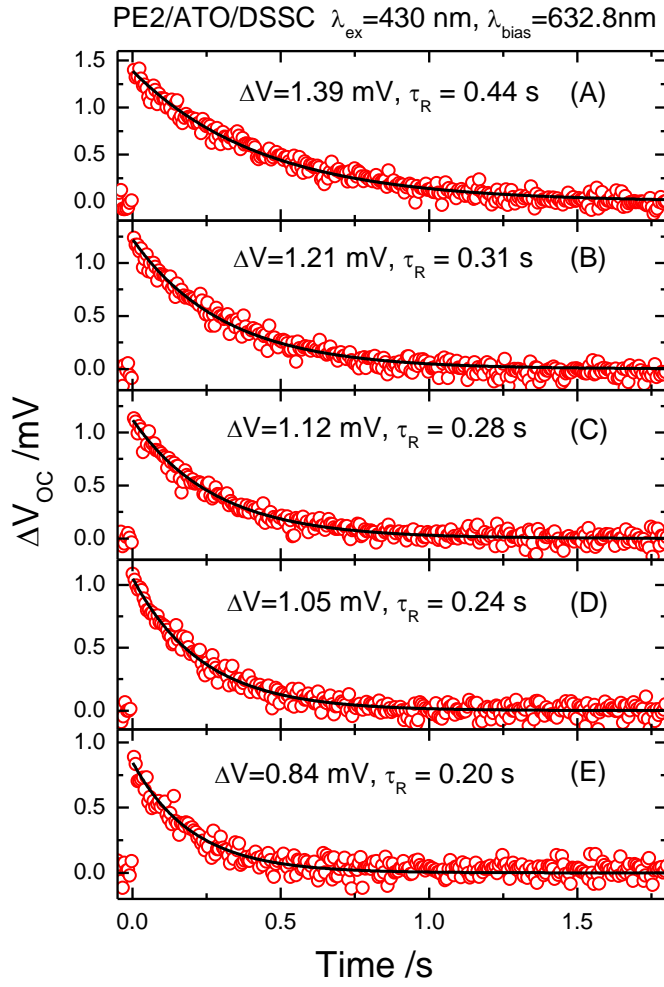

**Figure S8:** Photovoltage transients of PE2/ATO solar cells obtained at an open-circuit condition with pulse excitation at 430 nm under bias illumination at 632.8 nm for photon fluxes  $I_0/10^{15} \text{ cm}^{-2} \text{ s}^{-1} =$  (A) 2.2, (B) 4.7, (C) 6.3, (D) 7.3, and (E) 11. The transient data (circles) were fitted according to a simple kinetic model described in the text.

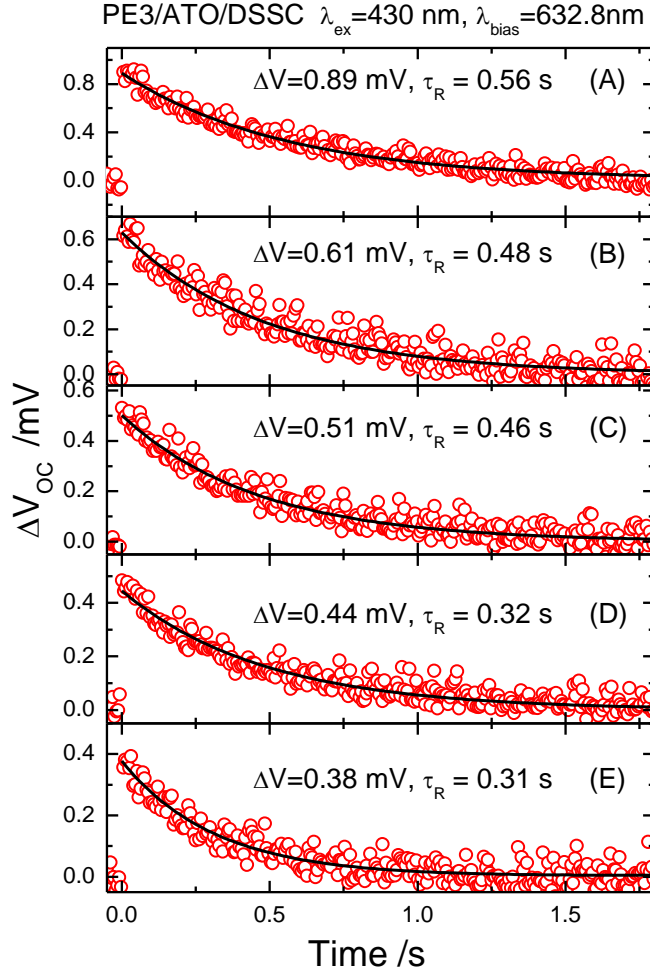

**Figure S9:** Photovoltage transients of PE3/ATO solar cells obtained at an open-circuit condition with pulse excitation at 430 nm under bias illumination at 632.8 nm for photon fluxes  $I_0/10^{15} \text{ cm}^{-2} \text{ s}^{-1} =$  (A) 2.2, (B) 4.7, (C) 6.3, (D) 7.3, and (E) 11. The transient data (circles) were fitted according to a simple kinetic model described in the text.

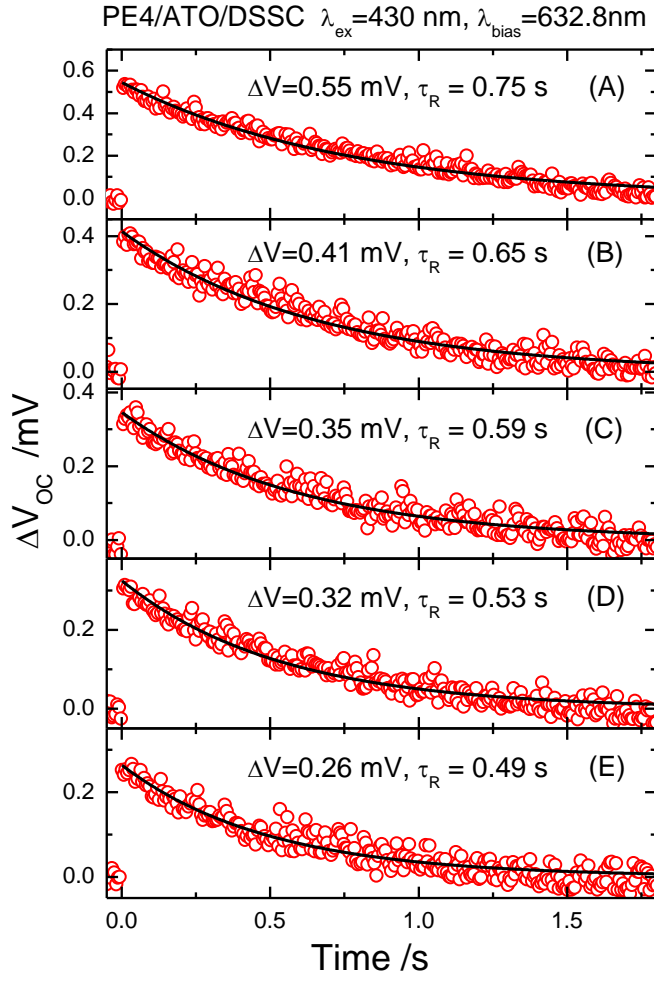

**Figure S10:** Photovoltage transients of PE4/ATO solar cells obtained at an open-circuit condition with pulse excitation at 430 nm under bias illumination at 632.8 nm for photon fluxes  $I_0/10^{15} \text{ cm}^{-2} \text{ s}^{-1} =$  (A) 2.2, (B) 4.7, (C) 6.3, (D) 7.3, and (E) 11. The transient data (circles) were fitted according to a simple kinetic model described in the text.
